# Supplementary material for: Electrically tunable interlayer recombination and tunneling behavior in WSe2/MoS2 heterostructure for broadband photodetector
Source: Royal Society of Chemistry journal article supplement (doi:10.1039/d3nr06144b), 2024-01-01
Supplement: d3nr06144b1.pdf [file d3nr06144b1.pdf]

## Supporting Information

### Electrically Tunable Interlayer Recombination and Tunneling Behavior in WSe<sub>2</sub>/MoS<sub>2</sub> Heterostructure for Broadband Photodetector

Chao Tan,<sup>§a</sup> Zhihao Yang,<sup>§a</sup> Haijuan Wu,<sup>a</sup> Yong Yang,<sup>b</sup> Lei Yang<sup>a</sup> and Zegao Wang<sup>\*a</sup>

As shown in Figure S1, the top-gate voltage (x-axis) and bias voltage (y-axis) divide the conductivity of the device into four parts, which has the potential of multi-dimensional tunability [1, 2]. As shown in (e), zone A, B belong the state IV (the division of the state is shown in Figure 3), where both forward and reverse bias voltages drive a diffusion of electron carriers between WSe<sub>2</sub> and MoS<sub>2</sub> to generate the drain current. Zone C, D belongs the state II, where the heterostructure is a typical p-n junction. Hence, at zone C the forward bias leads to a diffusion current contributed to the diffusion of majority carriers, while the reverse bias generates a drift current attributed to the minority carriers at zone D [3, 4]. Moreover, it was observed that the depletion zone (state III) gets wider significantly with higher positive back-gate voltage. Wherein, the state IV remains unmoved, and the state II shifts towards left. However, with higher negative back-gate voltage, the depletion zone slightly widens, where the state IV and II shift to right.

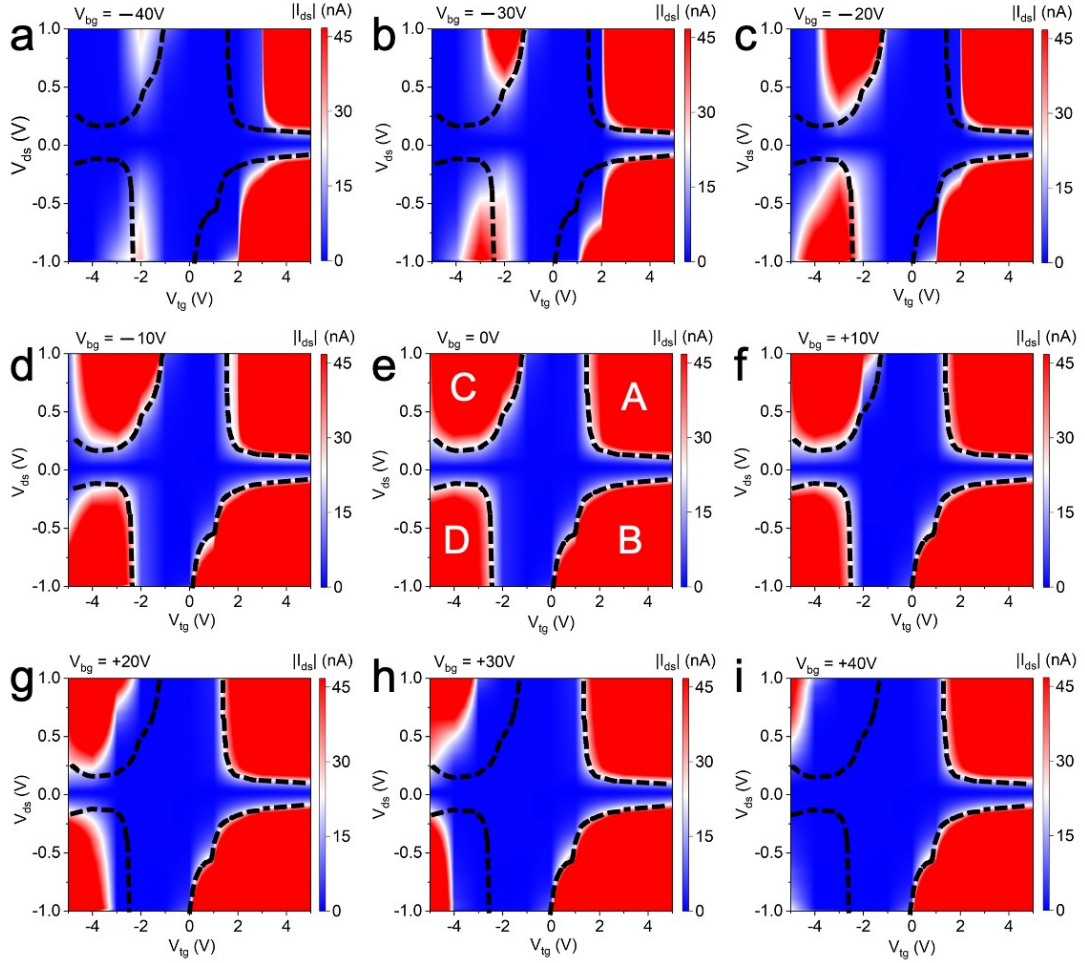

**Figure S1** Transfer characteristics at varying bias voltages under different back-gate voltages. All the black dash lines are copied from that of (e), which presents the change of the transfer's contour color under different back-gate voltages.

At the p-i state (see Figure 3), the Fermi level starts to shift toward the conduction band in MoS<sub>2</sub> and the accumulated holes in WSe<sub>2</sub> diffuses into MoS<sub>2</sub>, resulting in a diffusion current. With more positive  $V_{tg}$ , the carrier concentrations in WSe<sub>2</sub> and MoS<sub>2</sub> reach an equilibrium state. In the process, the variation of  $V_{tg}$  impedes the diffusion of majority carriers between WSe<sub>2</sub> and MoS<sub>2</sub>. With further more positive  $V_{tg}$ , MoS<sub>2</sub> turns into the electron accumulation state and the electron concentration in MoS<sub>2</sub> becomes higher than that of WSe<sub>2</sub>. Thus, the increase of  $V_{tg}$  benefits the diffusion current in the device until the state of i-n.

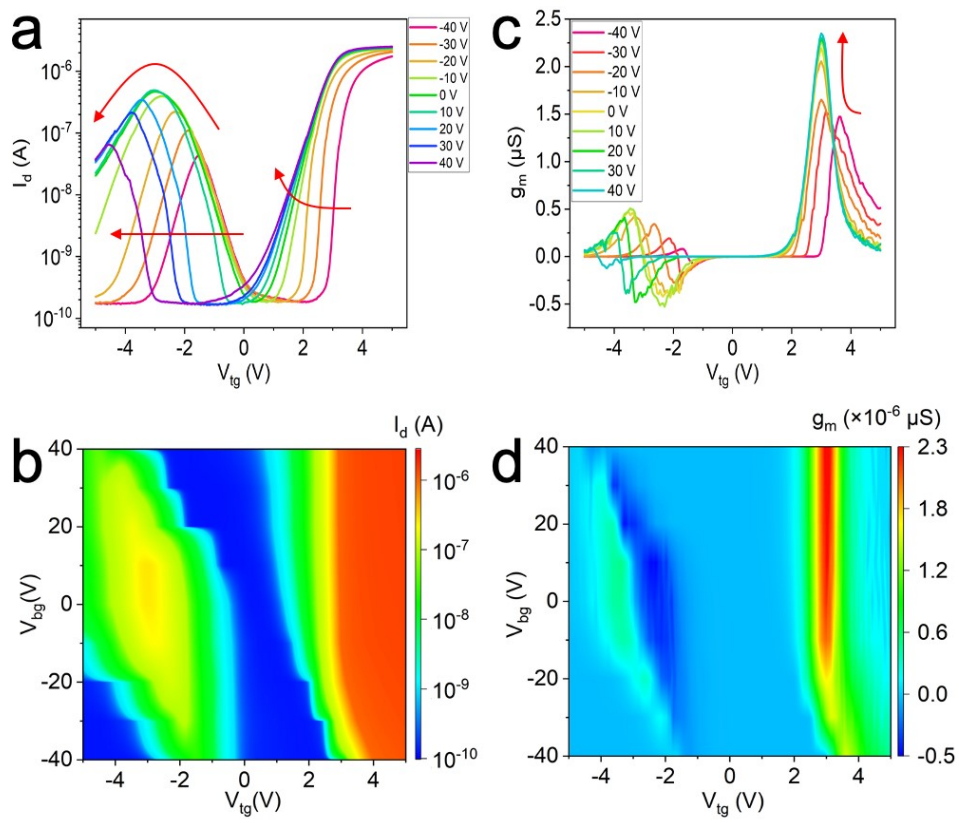

**Figure S2** (a, b) Transfer and (c, d) transconductance characteristics under different back-gate voltages at fixed bias voltage of 1 V.

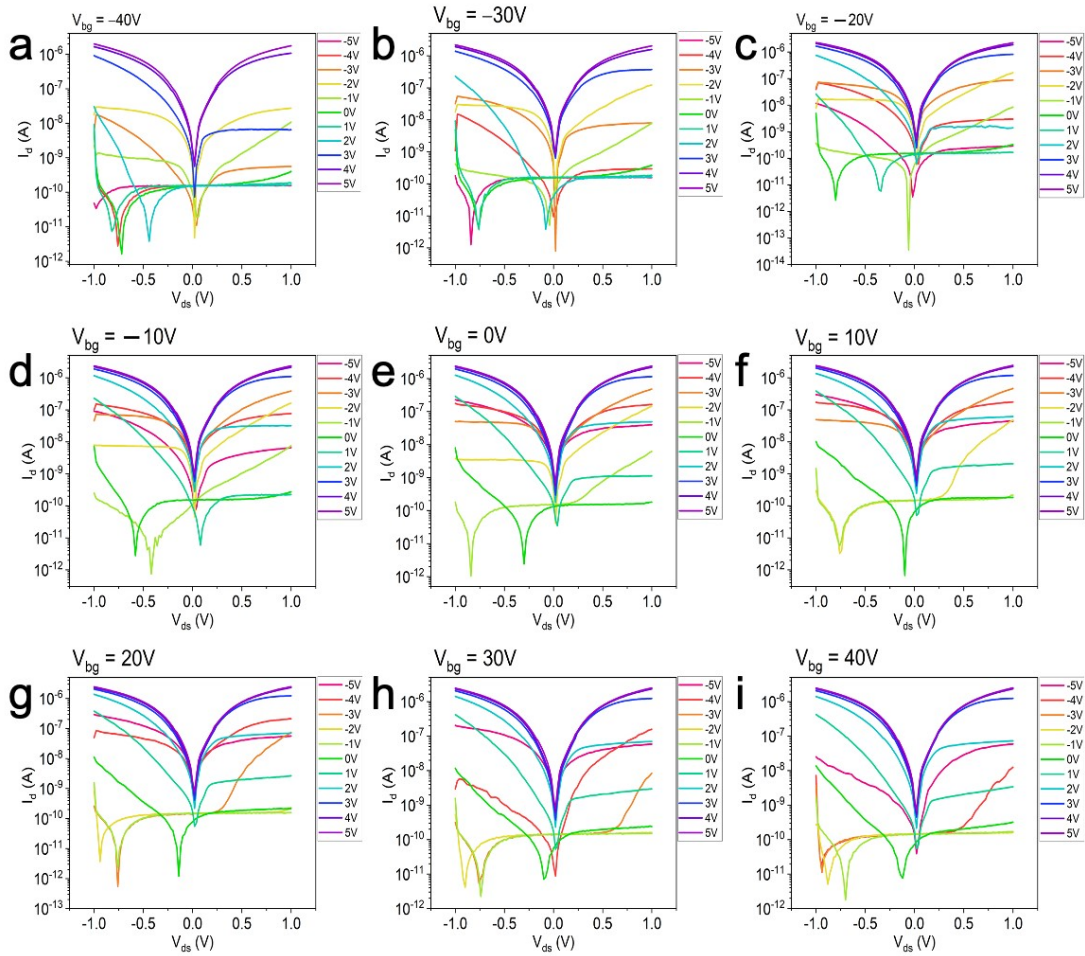

**Figure S3** Output curves under different top- and back-gate voltages.

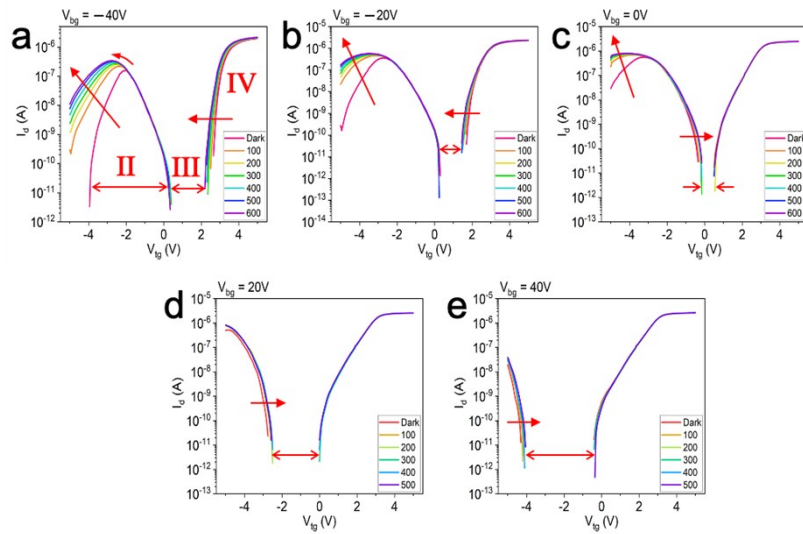

**Figure S4** Transfer curves under illumination of 400 nm wavelength with different light intensity at different back-gate voltages and fixed bias voltage of 1 V. The marked

regions (II, III and IV) in the figures represent different electrical states of the device at different top-gate voltages. It shows that the state II widens and the state IV shifts to left with increasing light intensity.

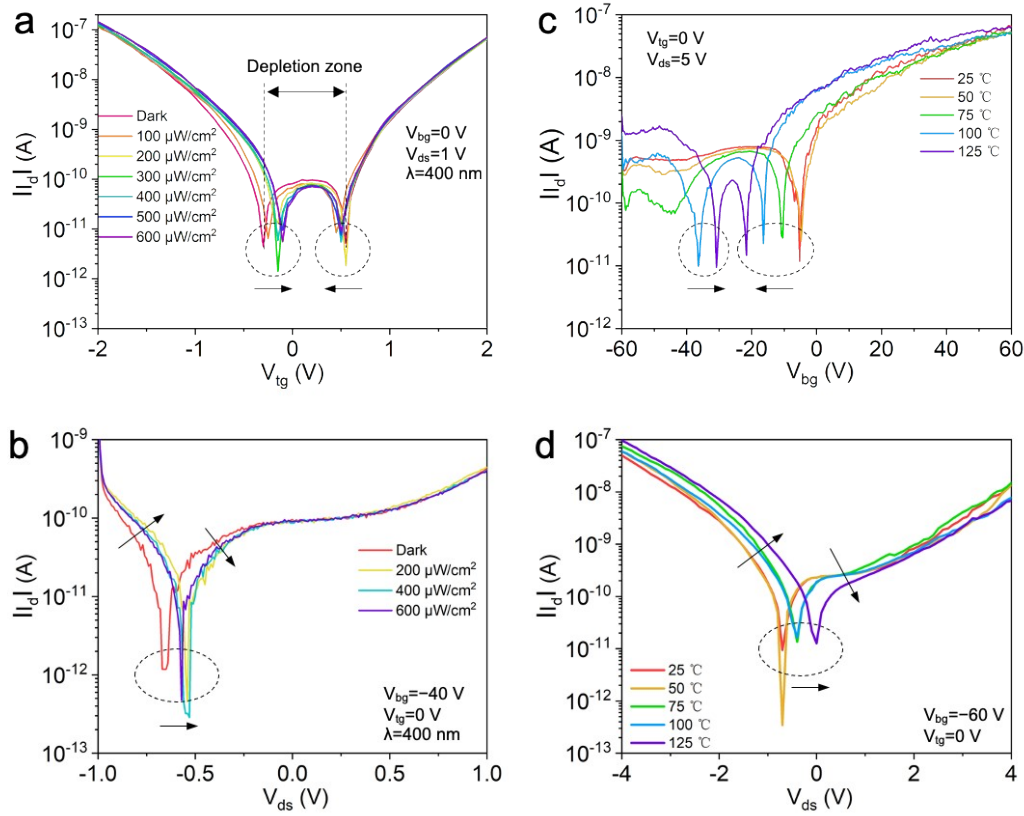

**Figure S5** (a) Transfer characteristics under illumination of 400 nm wavelength with different light intensity at fixed back-gate voltage of 0 V and fixed bias voltage of 1 V. (b) Output characteristics under illumination of 400 nm wavelength with different light intensity at fixed top- and back-gate voltages of 0 V and -40 V, respectively. (c) Transfer characteristics under different temperatures at fixed top-gate voltage of 0 V and fixed bias voltage of 5 V. (d) Output characteristics under different temperatures at fixed top- and back-gate voltages of 0 V and -60 V, respectively.

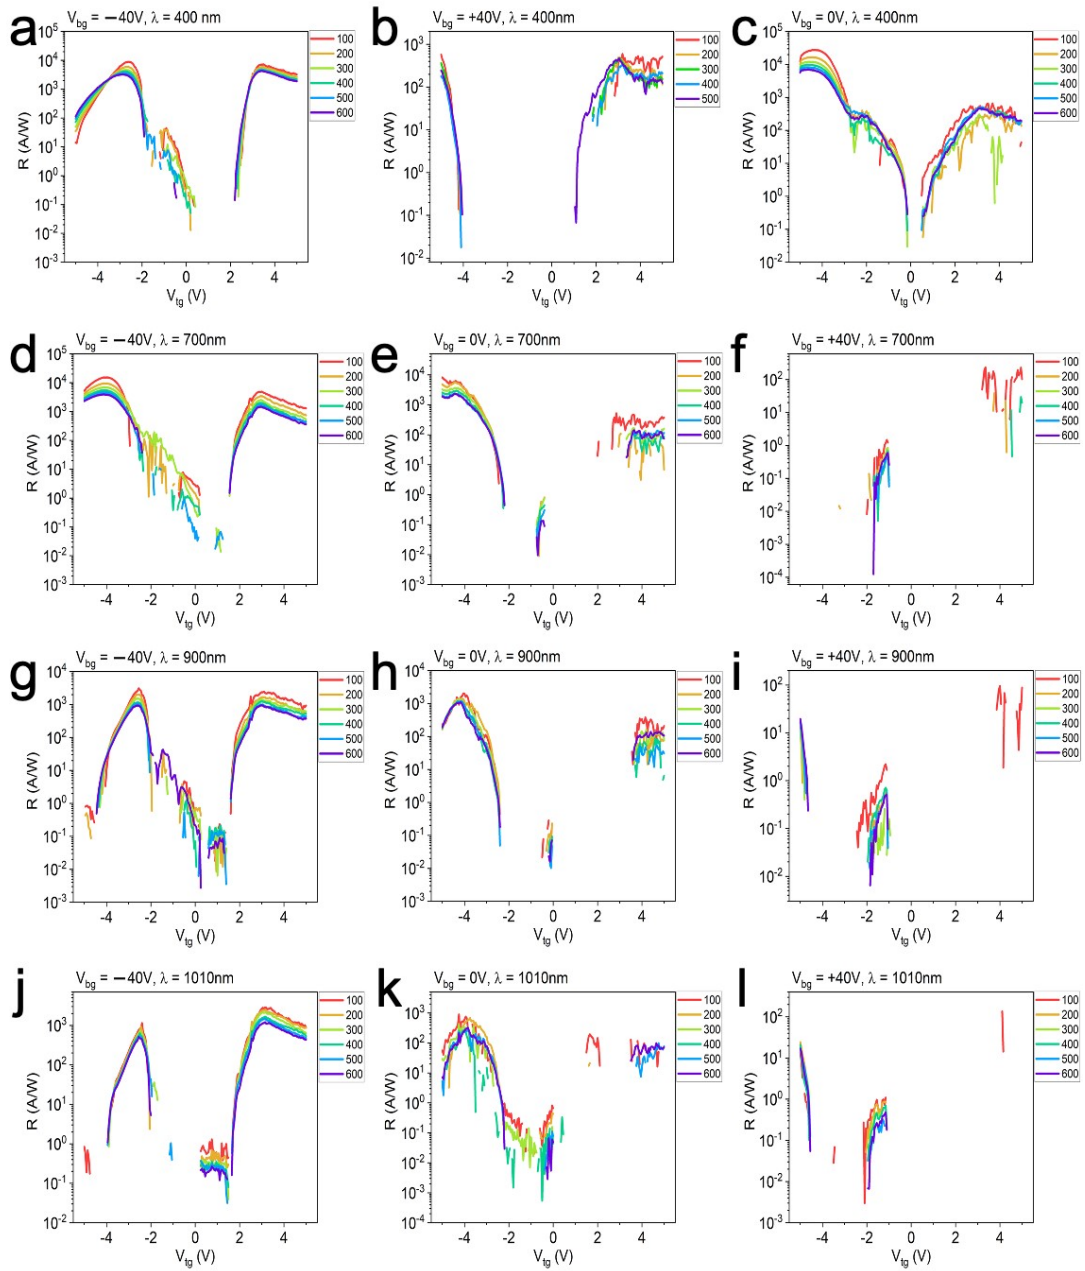

**Figure S6** The responsivity curves under illumination of 400, 700, 900 and 1010 nm wavelengths with different light intensity at different top- and back-gate voltages and fixed bias voltage of 1 V.



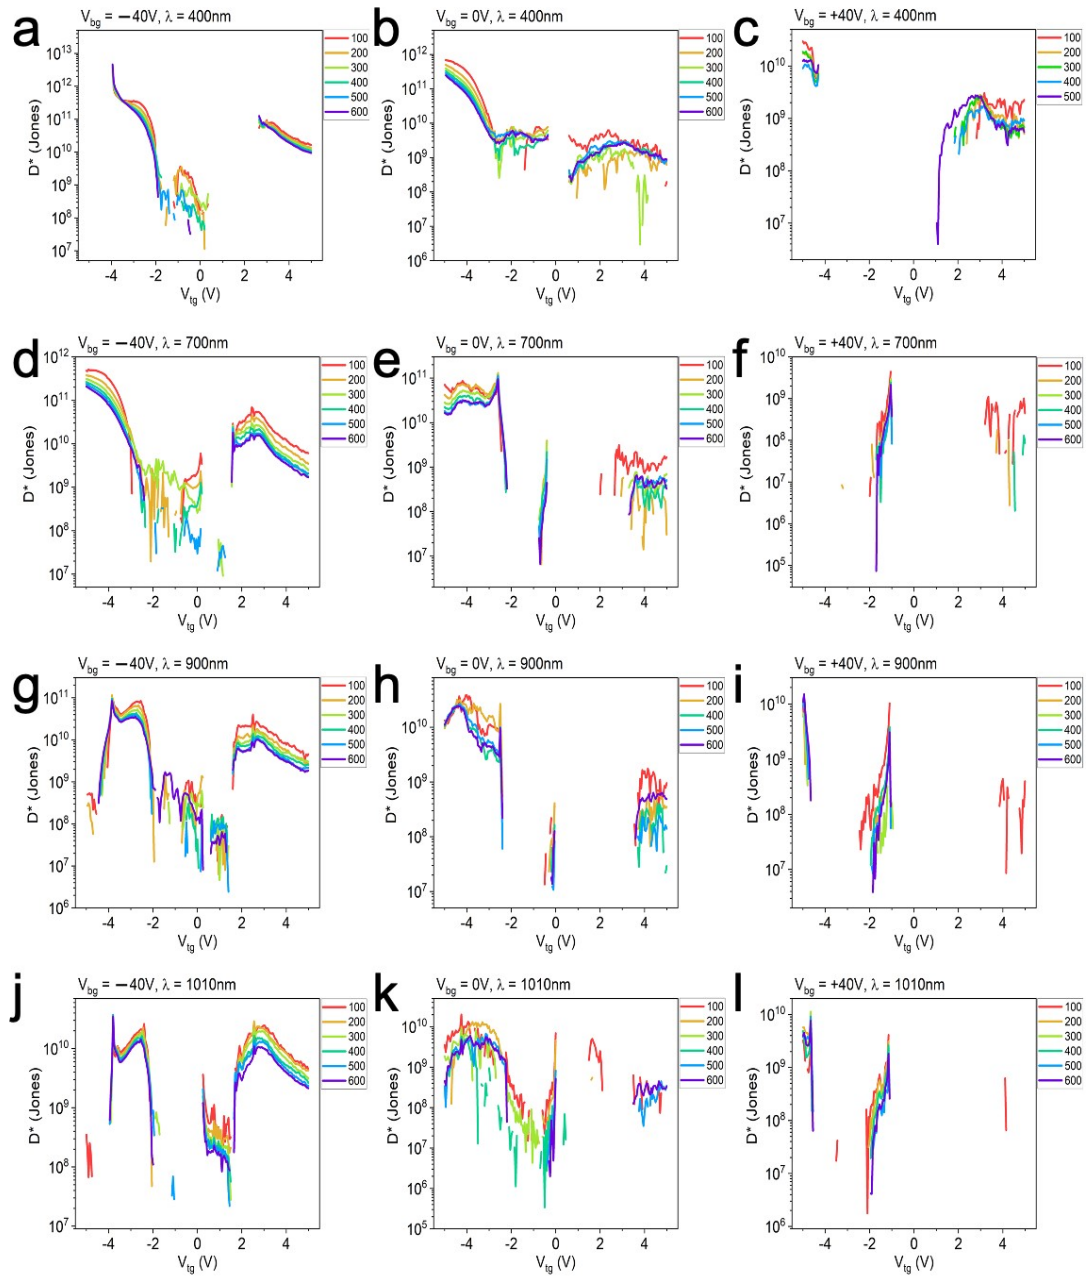

**Figure S7** The specific detectivity curves under illumination of 400, 700, 900 and 1010 nm wavelengths with different light intensity at different top- and back-gate voltages and fixed bias voltage of 1 V.

**Table S1** Performance comparison of 2D heterostructure-based photodetectors.

| Materials<br>Configuration         | Wavelength<br>nm | Responsivity<br>A/W   | Specific Detectivity<br>Jones | Ref. |
|------------------------------------|------------------|-----------------------|-------------------------------|------|
| WSe <sub>2</sub> /CuO              | 530              | $0.28 \times 10^{-3}$ | $0.19 \times 10^{10}$         | [5]  |
| WSe <sub>2</sub> /MoS <sub>2</sub> | 532              | 1.392                 | $7.78 \times 10^{12}$         | [6]  |
| b-AsP/WSe <sub>2</sub>             | 275              | 244                   | $2.27 \times 10^{12}$         | [7]  |

|                                                     |      |                       |                       |                  |
|-----------------------------------------------------|------|-----------------------|-----------------------|------------------|
| WSe <sub>2</sub> /hBN                               | 532  | 170                   | 1.1×10 <sup>12</sup>  | [8]              |
| WSe <sub>2</sub> /MoS <sub>2</sub>                  | 532  | 2700                  | 5×10 <sup>11</sup>    | [9]              |
| MoS <sub>2</sub> /WSe <sub>2</sub>                  | 633  | 8                     | 2.93×10 <sup>11</sup> | [10]             |
| WS <sub>2</sub> /WSe <sub>2</sub> /p-Si             | 405  | 3.72                  | 2.39×10 <sup>12</sup> | [11]             |
| Ta <sub>2</sub> NiSe <sub>5</sub> /WSe <sub>2</sub> | 638  | 0.04×10 <sup>-3</sup> | 3.6×10 <sup>5</sup>   | [12]             |
| InSe/WSe <sub>2</sub>                               | 633  | 5300                  | 10 <sup>11</sup>      | [13]             |
| PtS <sub>2</sub> /WSe <sub>2</sub>                  | 635  | 0.42                  | 1.37×10 <sup>12</sup> | [14]             |
| WSe <sub>2</sub> /MoS <sub>2</sub>                  | 400  | 27445                 | 10 <sup>13</sup>      | <b>This work</b> |
| WSe <sub>2</sub> /MoS <sub>2</sub>                  | 1010 | 2827                  | 10 <sup>10</sup>      | <b>This work</b> |

## Reference

- [1] X. Ji, Z. Bai, *et al.* *ACS Omega* **2022**, 7(12):10049-10055.
- [2] M. Yang, Y. Lu, *et al.* *Applied Physics Letters* **2022**, 121(4):043501.
- [3] G.H. Shin, C. Park, *et al.* *Nano Lett* **2020**, 20(8):5741-5748.
- [4] H.B. Jeon, G.H. Shin, *et al.* *Advanced Electronic Materials* **2020**, 6(7):2000091.
- [5] R.P. Patel, P.M. Pataniya, *et al.* *Sensors and Actuators A: Physical* **2023**, 356:114339.
- [6] R. Mao, Z. Liu, *et al.* *Applied Physics Express* **2023**, 16(3):034001.
- [7] F. Zhao, D. Wang, *et al.* *Applied Physics Letters* **2023**, 122(15):151105.
- [8] S. Ghosh, A. Varghese, *et al.* *Nature Communications* **2021**, 12(1):3336.
- [9] G.H. Shin, C. Park, *et al.* *Nano Letters* **2020**, 20(8):5741-5748.
- [10] Y. Xiao, J. Qu, *et al.* *Frontiers of Optoelectronics* **2022**, 15(1):41.
- [11] Z. Huang, M. Yang, *et al.* *Science China Materials* **2023**, 66(6):2354-2363.
- [12] P. Xiao, S. Zhang, *et al.* *Sensors* **2023**, 23(9):4385.
- [13] C.R. Paul Inbaraj, R.J. Mathew, *et al.* *ACS Applied Materials & Interfaces* **2023**, 15(15):19121-19128.
- [14] C. Tan, S. Yin, *et al.* *ACS Nano* **2021**, 15(5):8328-8337.
